# Supplementary material
Source: Springer Nature journal article supplement (https://www.springermedizin.de/resource/supplementary/12935_2009_240_MOESM9_ESM.pdf/9540224)

**G292**

**PC3**

**MDA-  
MB231**

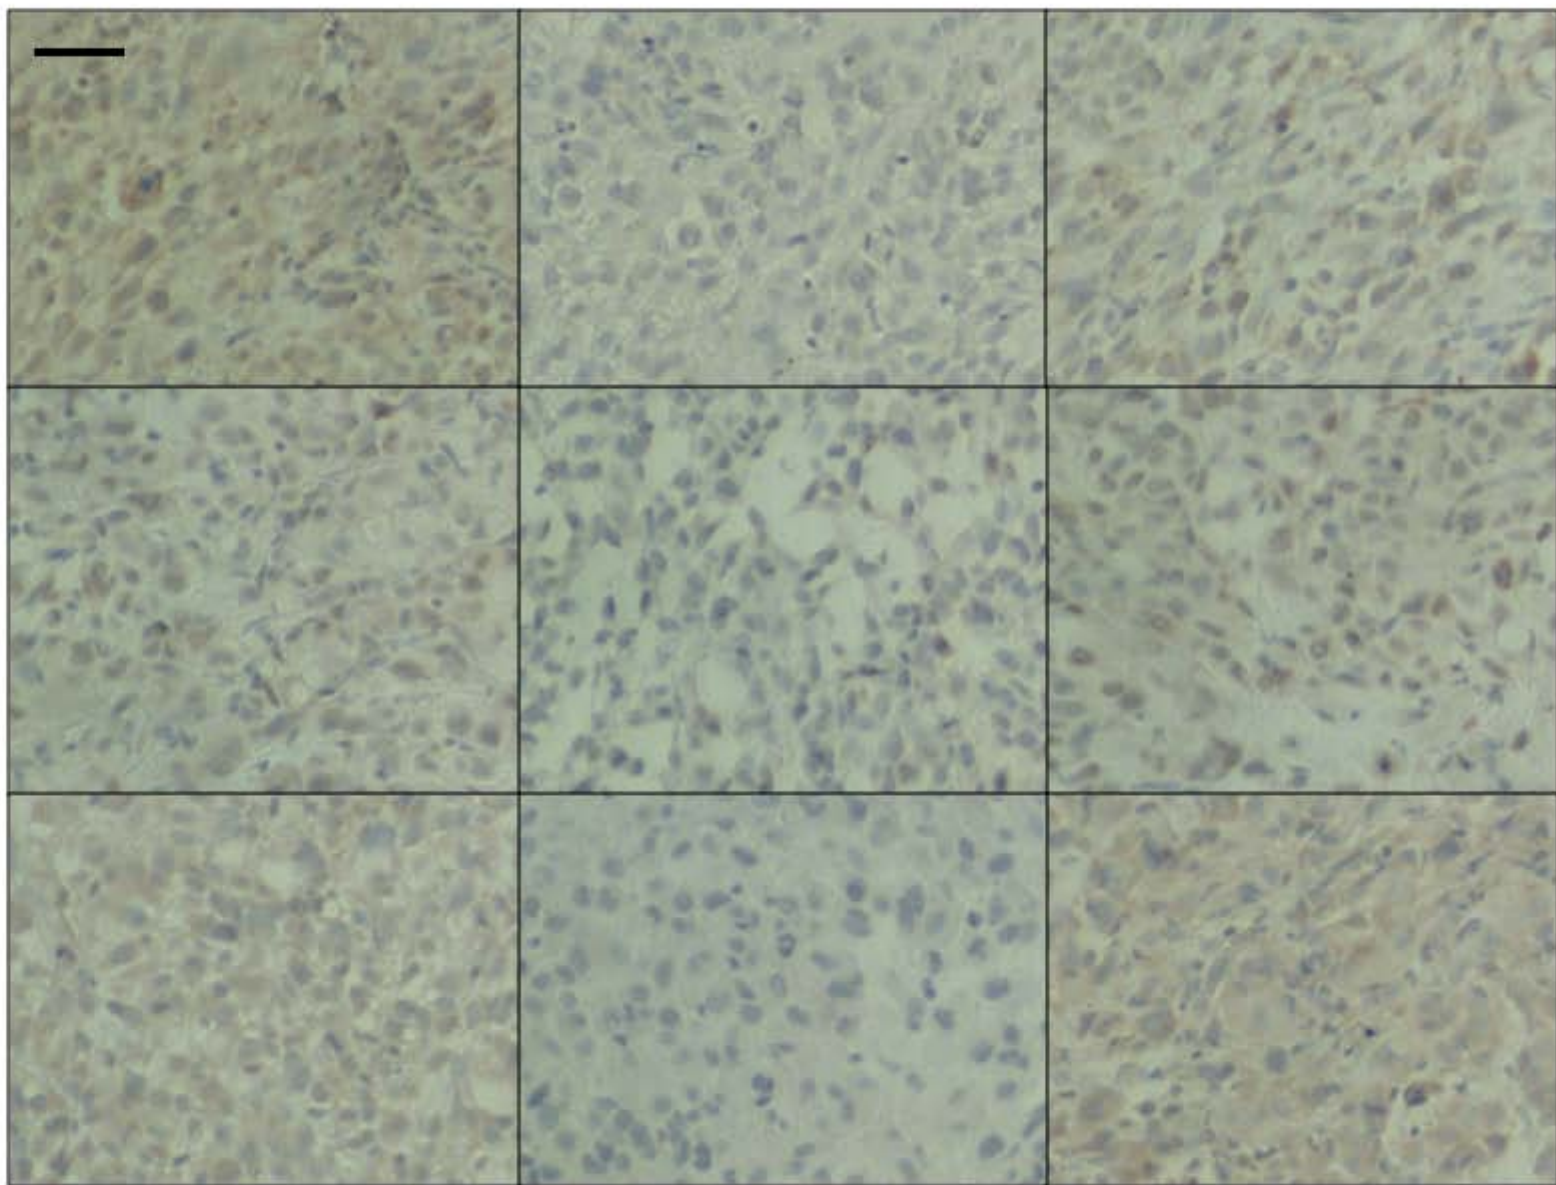

**Cells**

**Dz13**

**Scr**

Supplement: MOESM9 [file 9540224]
